# Supplementary material for: Gearing motion in cogwheel pairs of molecular rotors: weak-coupling limit
Source: Royal Society of Chemistry journal article supplement (doi:10.1039/c5ce01372k), 2015-01-01
Supplement: c5ce01372k1.pdf [file c5ce01372k1.pdf]

Supplementary information for

# Gearing motion in cogwheels pairs of molecular rotors: weak-coupling limit

Jiří Kaleta,<sup>a</sup> Josef Michl,<sup>a,b</sup> Cécile Mézière,<sup>c</sup> Sergey Simonov,<sup>d</sup> Leokadiya Zorina,<sup>d</sup> Pawel Wzietek,<sup>e</sup> Antonio Rodríguez-Forteza,<sup>f</sup> Enric Canadell,<sup>g</sup> and Patrick Batail<sup>\*c</sup>

This PDF file includes:

## Table S1

**Table S1.** Geometry of C–H···N hydrogen bonds in **1**.

| H···N distance, Å | C···N distance, Å | C–H···N angle, ° |
|-------------------|-------------------|------------------|
| <b>293 K</b>      |                   |                  |
| 2.64              | 3.481(4)          | 150.0            |
| <b>120 K</b>      |                   |                  |
| 2.56              | 3.418(4)          | 150.9            |
